# Supplementary material for: Socioeconomic disparities and cardio-cerebrovascular diseases: A nationwide cross-sectional study
Source: PubMed Central journal article supplement (PMC11466497; doi:10.7189/jogh.14.04210), 2024-10-11

## Supplementary Material

### **Socioeconomic disparities and cardio-cerebrovascular disease: A nationwide population-based cross-sectional study**

Ji Woong Roh, MD, PhD<sup>1†</sup>; SungA Bae, MD, PhD<sup>1†</sup>; Moon-Hyun Kim, MD<sup>1</sup>; Je-Wook Park, MD<sup>1</sup>; Seok-Jae Heo, PhD<sup>2</sup>; Minkwan Kim, MD,

PhD<sup>1</sup>; Oh-Hyun Lee, MD<sup>1</sup>; Yongcheol Kim, MD, PhD<sup>1</sup>; Eui Im, MD<sup>1</sup>; Jae-Sun Uhm, MD, PhD<sup>2</sup>; Jung In Hyun, MD, PhD<sup>1</sup>;

Deok-Kyu Cho, MD<sup>1\*</sup>; Donghoon Choi, MD, PhD<sup>3\*</sup>

#### **CONTENTS**

**Supplementary Table S1. The monthly income quartile of the sample population by year.**

**Supplementary Table S2. Trends in prevalence between 2007 and 2018**

**Supplementary Table S3. Relationship between cardiovascular risk factors and CVD by education and income**

**Supplementary Figure S1. Study flow chart**

**Supplementary Figure S2. Difference in CVD prevalence by education level (A) income level (B) by 4 division**

**Supplementary Table S1. The monthly income quartile of the sample population by year.**

|              | Quartile (2007-2009) |        |        |        | Quartile (2010-2012) |        |        |        | Quartile (2013-2015) |        |        |        | Quartile (2016-2018) |        |        |        |
|--------------|----------------------|--------|--------|--------|----------------------|--------|--------|--------|----------------------|--------|--------|--------|----------------------|--------|--------|--------|
|              | 1                    | 2      | 3      | 4      | 1                    | 2      | 3      | 4      | 1                    | 2      | 3      | 4      | 1                    | 2      | 3      | 4      |
| <b>Men</b>   |                      |        |        |        |                      |        |        |        |                      |        |        |        |                      |        |        |        |
| 30-34        | 664.8                | 943.6  | 1218.2 | 1728.3 | 918.6                | 1236.7 | 1478.7 | 2172.9 | 1001.3               | 1361.8 | 1848   | 2480.7 | 1295.5               | 1732.4 | 2287.3 | 3058.2 |
| 35-39        | 712.5                | 985.3  | 1274.9 | 1732.2 | 939.9                | 1292.7 | 1500.3 | 2180.4 | 1030.8               | 1399.5 | 1788.9 | 2412   | 1257.6               | 1667.8 | 2150.5 | 2850.5 |
| 40-44        | 673.9                | 1045.4 | 1354.5 | 1837.7 | 979.2                | 1327.1 | 1572.4 | 2435.8 | 1014.9               | 1442.8 | 1940   | 2559.8 | 1238.7               | 1737   | 2244.6 | 2948.1 |
| 45-49        | 626.8                | 949.2  | 1274.1 | 1912.2 | 892.9                | 1316.8 | 1585.3 | 2312.2 | 935                  | 1440.6 | 1900.9 | 2680.8 | 1235.7               | 1743.5 | 2326.3 | 3103.9 |
| 50-54        | 554                  | 917.1  | 1349.4 | 1900.4 | 876.6                | 1390.5 | 1721.5 | 2816.9 | 868.9                | 1359.5 | 1944.6 | 2822.1 | 1178.5               | 1858.3 | 2544.9 | 3578.7 |
| 55-59        | 456.3                | 796.8  | 1169.7 | 1807.7 | 875.4                | 1347.8 | 1629.6 | 2683.3 | 785.2                | 1246.1 | 1841.1 | 2705.2 | 1071.3               | 1794.1 | 2445.6 | 3437.5 |
| 60-64        | 379.8                | 607.8  | 875.6  | 1336.7 | 658.9                | 1059.1 | 1308.5 | 2209.4 | 618.7                | 1066.1 | 1502.9 | 2281.3 | 854.5                | 1336.9 | 1895.1 | 2741.7 |
| <b>Women</b> |                      |        |        |        |                      |        |        |        |                      |        |        |        |                      |        |        |        |
| 30-34        | 697.6                | 933.9  | 1201.1 | 1598.3 | 935.9                | 1247.1 | 1577.2 | 2161.3 | 973.8                | 1358.7 | 1787.8 | 2521.5 | 1211.2               | 1611.8 | 2071.2 | 2857.2 |
| 35-39        | 683                  | 997.8  | 1312.3 | 1780.6 | 951.4                | 1290.9 | 1623.9 | 2248.1 | 935.2                | 1351.6 | 1733.3 | 2308.2 | 1195.3               | 1611.4 | 2072.8 | 2766.5 |
| 40-44        | 669.7                | 985.1  | 1315.6 | 1905.6 | 859.2                | 1260.9 | 1703.7 | 2478.6 | 1009.2               | 1459.1 | 1962.5 | 2676.3 | 1245.8               | 1791.8 | 2316.7 | 3038.9 |
| 45-49        | 556.7                | 896.5  | 1242.3 | 1894.6 | 894.1                | 1374.6 | 1860.6 | 2619.8 | 851.6                | 1303.3 | 1864.6 | 2727.7 | 1151.9               | 1730.2 | 2373.1 | 3154.5 |
| 50-54        | 496.9                | 815.1  | 1205.1 | 1849.8 | 878.8                | 1329.2 | 1828.3 | 2701.4 | 856.2                | 1367.3 | 1957.6 | 2914.3 | 1158.9               | 1835.1 | 2448.6 | 3429.9 |
| 55-59        | 401.1                | 643.9  | 951.5  | 1466.9 | 699.9                | 1102.8 | 1580.2 | 2325.7 | 696.8                | 1119.9 | 1611.2 | 2436.5 | 940.9                | 1488.2 | 2123.3 | 2959.2 |
| 60-64        | 279.5                | 463.7  | 681    | 1160.3 | 461.3                | 753.4  | 1142.3 | 1728.4 | 494.5                | 821.9  | 1236.5 | 1829.5 | 687.2                | 1151.6 | 1643   | 2414.2 |

Unit: Dollars

**Supplementary Table S2. Trends of prevalence between 2007 and 2018**

|                                   | Total population<br>(N =47,735) | 2007~2010<br>(N =16,246) | 2011~2014<br>(N =15,768) | 2015~2018<br>(N =15,721) | <i>P</i> value |
|-----------------------------------|---------------------------------|--------------------------|--------------------------|--------------------------|----------------|
| <b>Demographics</b>               |                                 |                          |                          |                          |                |
| Age (years)                       | 47.0 (39.0-55.0)                | 46.0 (38.0-54.0)         | 47.0 (39.0-55.2)         | 48.0 (40.0-56.0)         | <0.001         |
| Gender, male                      | 20881 (43.7%)                   | 7152 (44.0%)             | 6819 (43.2%)             | 6910 (44.0%)             | 0.303          |
| Urban                             | 38743 (81.2%)                   | 12690 (78.1%)            | 13001 (82.5%)            | 13052 (83.0%)            | <0.001         |
| Job, white-collar                 | 11468 (24.0%)                   | 3402 (20.9%)             | 3666 (23.2%)             | 4400 (28.0%)             | <0.001         |
| Percentage of health screening    | 27376 (57.3%)                   | 8856 (54.5%)             | 8348 (52.9%)             | 10172 (64.7%)            | <0.001         |
| Poor access to nutrition          | 21728 (45.5%)                   | 8029 (49.4%)             | 7563 (48.0%)             | 6136 (39.0%)             | <0.001         |
| Limited access to hospitals       | 4092 (8.6%)                     | 767 (4.7%)               | 2018 (12.8%)             | 1307 (8.3%)              | <0.001         |
| *Regular aerobic exercise         | 10906 (22.8%)                   | 2097 (12.9%)             | 2467 (15.6%)             | 6342 (40.3%)             | <0.001         |
| BMI > 30                          | 2581 (5.4%)                     | 723 (4.5%)               | 802 (5.1%)               | 1056 (6.7%)              | <0.001         |
| Current drinking                  | 33661 (70.5%)                   | 11424 (70.3%)            | 11034 (70.0%)            | 11203 (71.3%)            | <0.001         |
| Current smoking                   | 11824 (24.8%)                   | 5591 (34.4%)             | 3142 (19.9%)             | 3091 (19.7%)             | <0.001         |
| Low educational and low income    | 6,246 (13.1%)                   | 2,666 (16.4%)            | 1,992 (12.6%)            | 1,588 (10.1%)            | <0.001         |
| <b>Cardiovascular comorbidity</b> |                                 |                          |                          |                          |                |
| Hypertension                      | 11636 (24.4%)                   | 4083 (25.1%)             | 3622 (23.0%)             | 3931 (25.0%)             | <0.001         |
| Treatment                         | 5954 (51.2%)                    | 1940 (47.5%)             | 1844 (50.9%)             | 2170 (55.2%)             | <0.001         |
| Above >140/90mmHg                 | 7188 (15.1%)                    | 2755 (17.0%)             | 2244 (14.2%)             | 2189 (13.9%)             | <0.001         |
| Diabetes mellitus                 | 4446 (9.3%)                     | 1265 (7.8%)              | 1569 (10.0%)             | 1612 (10.3%)             | <0.001         |
| Treatment                         | 2322 (52.2%)                    | 720 (56.9%)              | 749 (47.7%)              | 853 (53.0%)              | <0.001         |

|                            | Total population<br>(N =47,735) | 2007~2010<br>(N =16,246) | 2011~2014<br>(N =15,768) | 2015~2018<br>(N =15,721) | <i>P</i> value |
|----------------------------|---------------------------------|--------------------------|--------------------------|--------------------------|----------------|
| HbA1c > 7.0%               | 3256 (6.8%)                     | 854 (5.3%)               | 1234 (7.8%)              | 1168 (7.4%)              | <0.001         |
| Dyslipidemia               | 14041 (29.4%)                   | 4232 (26.0%)             | 4414 (28.0%)             | 5395 (34.3%)             | <0.001         |
| Treatment                  | 2787 (19.8%)                    | 522 (12.3%)              | 845 (19.1%)              | 1420 (26.3%)             | <0.001         |
| LDL > 130mg/dL             | 14119 (29.6%)                   | 4446 (27.4%)             | 4411 (28.0%)             | 5262 (33.5%)             | <0.001         |
| MI or angina               | 643 (1.3%)                      | 245 (1.5%)               | 205 (1.3%)               | 193 (1.2%)               | 0.077          |
| Treatment                  | 492 (76.5%)                     | 176 (71.8%)              | 163 (79.5%)              | 153 (79.3%)              | 0.090          |
| Stroke                     | 522 (1.1%)                      | 169 (1.0%)               | 172 (1.1%)               | 181 (1.2%)               | 0.634          |
| Treatment                  | 330 (63.2%)                     | 104 (61.5%)              | 105 (61.0%)              | 121 (66.9%)              | 0.454          |
| CVD (MI, angina or stroke) | 1113 (2.3%)                     | 399 (2.5%)               | 362 (2.3%)               | 352 (2.2%)               | 0.410          |
| Treatment                  | 794 (71.3%)                     | 272 (68.2%)              | 258 (71.3%)              | 264 (75.0%)              | 0.098          |

\*5 days/week, daily 30 minutes

Values are presented as mean ± SD or n (%).

BMI, body mass index; CVD, cardio-cerebrovascular disease; DBP, diastolic blood pressure; HDL, high density lipoprotein; LDL, low density lipoprotein; MI, myocardial infarction; SBP, systolic blood pressure.

**Supplementary Table S3. Relationship between cardiovascular risk factors and CVD by education and income**

|                            | Group A<br>(N = 10,502) | Group B<br>(N = 10,502) | Group C<br>(N = 4,955) | Group D<br>(N = 6,246) |
|----------------------------|-------------------------|-------------------------|------------------------|------------------------|
|                            |                         | *Adjusted OR (95% CI)   | *Adjusted OR (95% CI)  | *Adjusted OR (95% CI)  |
| Hypertension               | Reference               | 1.13 (1.05-1.20)        | 1.28 (1.19-1.39)       | 1.49 (1.39-1.61)       |
| Diabetes mellitus          | Reference               | 1.28 (1.15-1.43)        | 1.43 (1.30-1.57)       | 1.56 (1.42-1.73)       |
| Dyslipidemia               | Reference               | 1.10 (1.04-1.16)        | 1.15 (1.07-1.23)       | 1.20 (1.12-1.28)       |
| MI or angina               | Reference               | 1.06 (0.82-1.37)        | 1.36 (1.06-1.73)       | 1.53 (1.22-1.91)       |
| Stroke                     | Reference               | 1.64 (1.24-2.17)        | 1.88 (1.40-2.51)       | 2.54 (1.97-3.28)       |
| CVD (MI, angina or stroke) | Reference               | 1.29 (1.07-1.57)        | 1.58 (1.30-1.92)       | 1.92 (1.61-2.28)       |

\*Adjusted: age, sex, urban, job, obesity

CVD, cardio-cerebrovascular disease; MI, myocardial infarction.

Supplementary Figure S1. Study flow chart

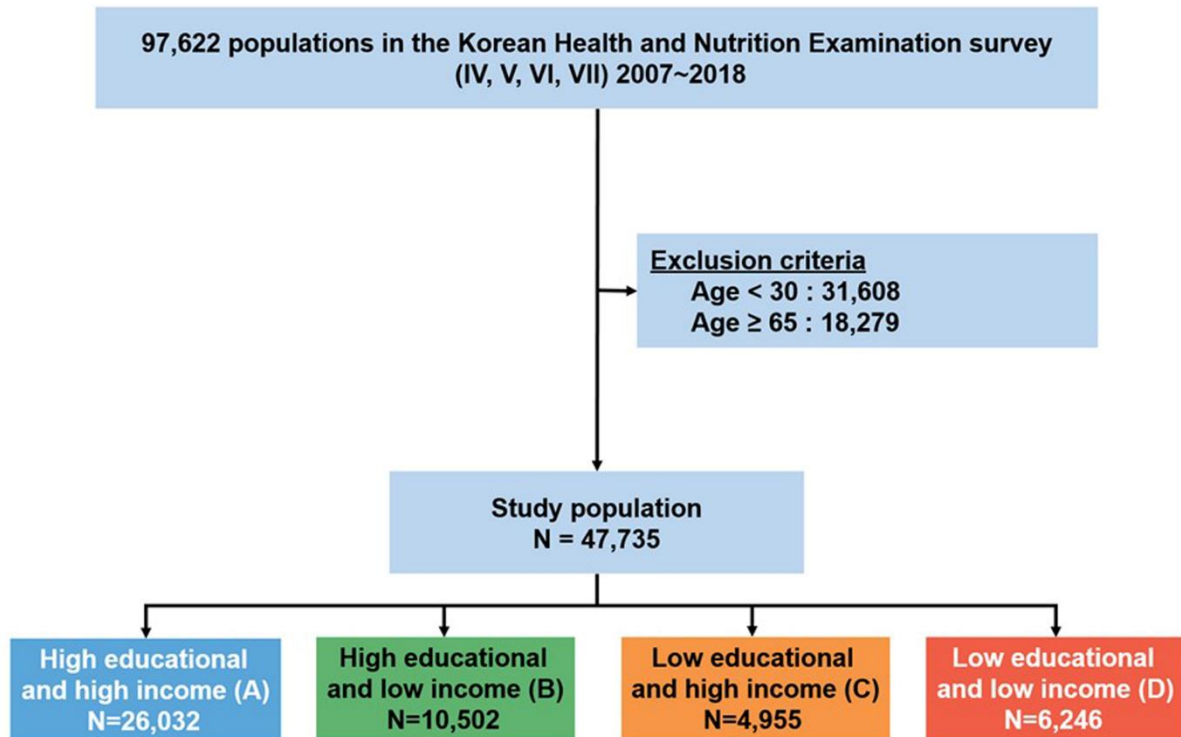

**Supplementary Figure S2. Difference in CVD prevalence by education level (A) income level (B) by 4 division**

**(A)**

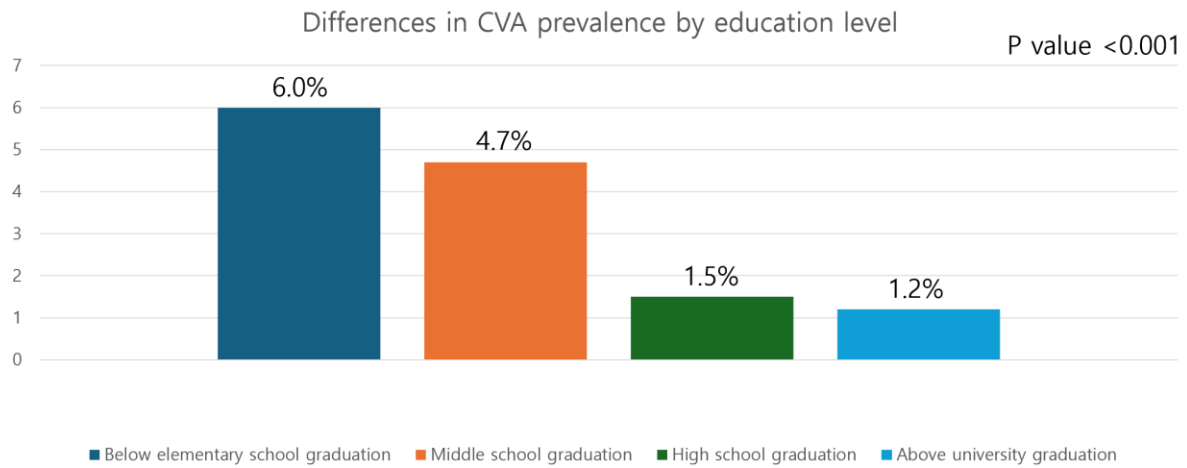

**(B)**

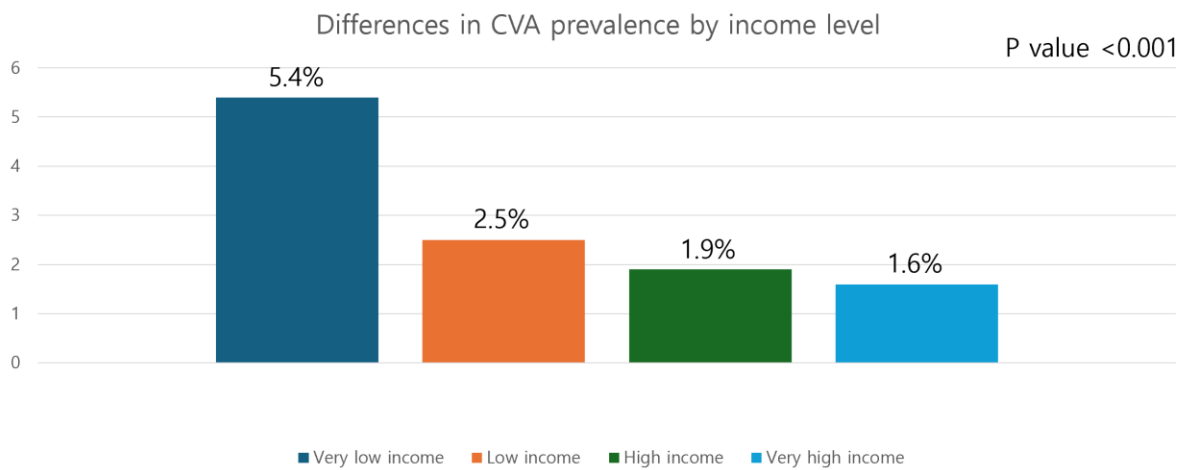

Supplement: jogh-14-04210-s001.pdf [file jogh-14-04210-s001.pdf]
